# Supplementary material for: Multiomic Analysis of Neurons with Divergent Projection Patterns Identifies Novel Regulators of Axon Pathfinding
Source: PubMed Central journal article supplement (PMC9561852; doi:10.1002/advs.202200615), 2022-08-21
Supplement: ADVS-9-2200615-s002.pdf [file ADVS-9-2200615-s002.pdf]

## Figure Legends to Supplementary Figures

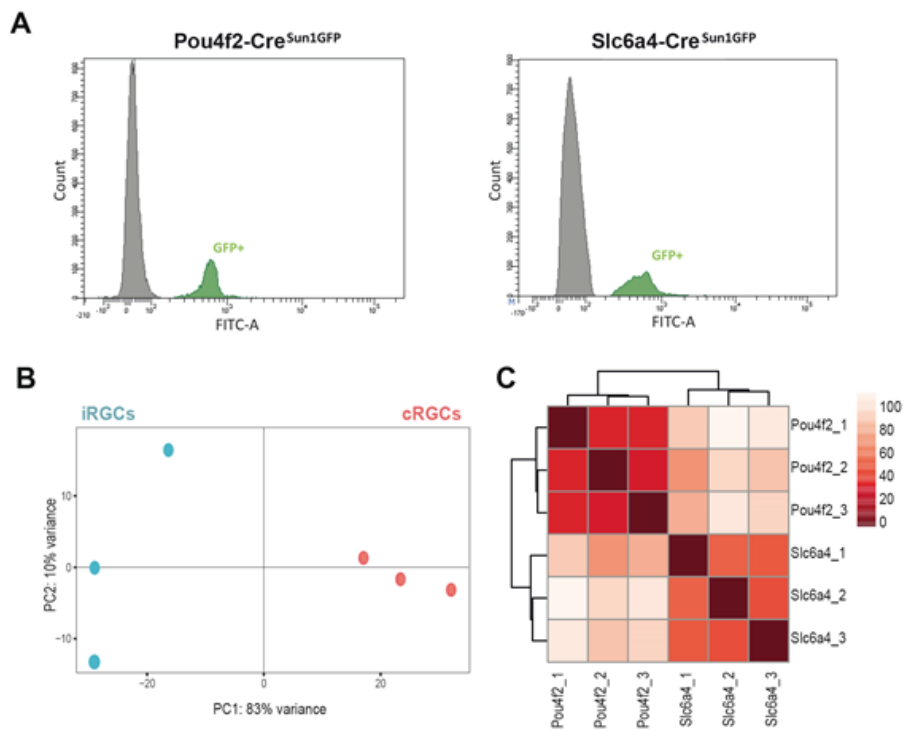

Figure S1

**Figure S1. A.** Flow cytometry signal for the specific isolation of fluorescence Sun1-GFP<sup>+</sup> cells from retinas of Slc6a4<sup>SunGFP</sup> and Pou4f2<sup>SunGFP</sup> embryos.

**B.** Principal component analysis of RNA-seq samples. Slc6a4<sup>SunGFP</sup> n=3; Pou4f2<sup>SunGFP</sup> n=3 independent samples.

**C.** Pearson correlation matrix between normalized RNA-seq samples clustered by Euclidian dendrogram. Slc6a4<sup>SunGFP</sup> n=3; Pou4f2<sup>SunGFP</sup> n=3 independent samples.

iRGCs 8635 genes associated to DARs cRGCs 5620 genes associated to DARs

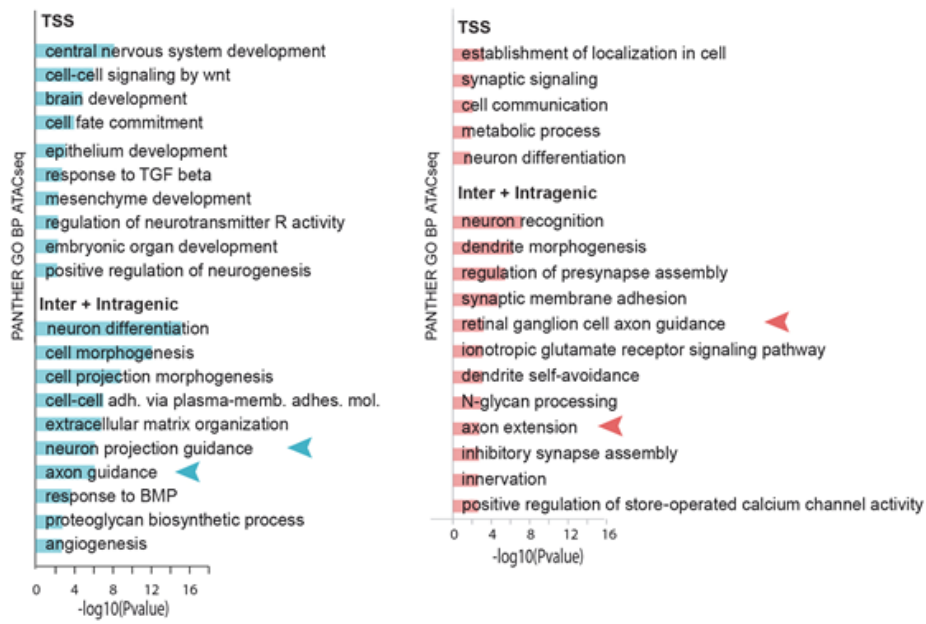

Figure S2

**Figure S2.** Panther GO Biological Process enrichment analysis of DARs located in the TSS or in enhancers that include both distal and proximal cis regulatory elements (CRE) and intragenic regions in cRGCs and iRGCs.  $P_{\text{adj}} < 0.05$  and  $|\log_2\text{FC}| \geq 1$ .

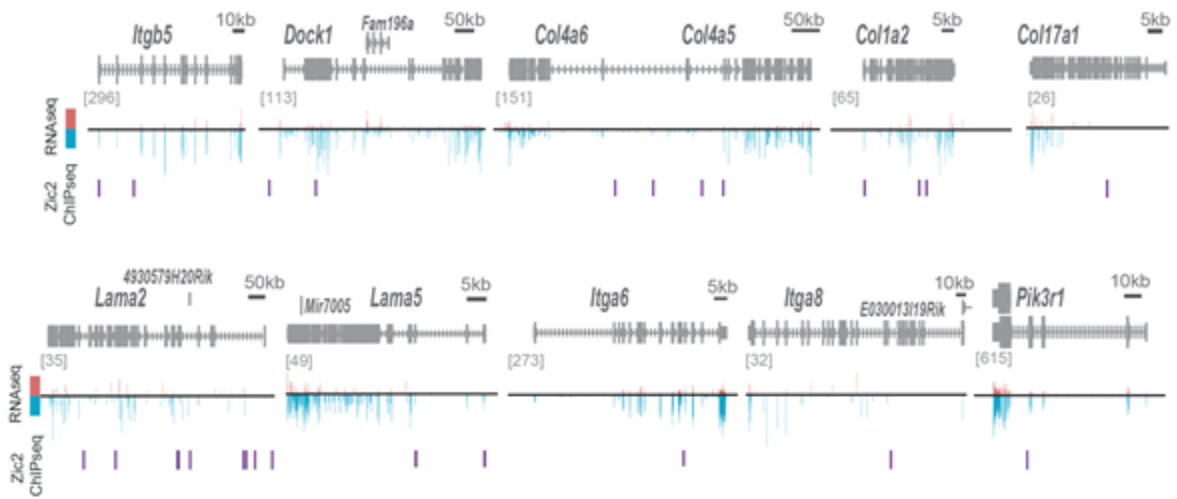

Figure S4

**Figure S3.** Genomic snapshots of RNA-seq and Zic2 ChIP-seq in retina at loci that encode for integrins differentially expressed in iRGCs and cRGCs.
